# Supplementary material for: Functionalization of anthracene: A selective route to brominated 1,4-anthraquinones
Source: publisher site journal article supplement (doi:10.3762/bjoc.7.118), 2011-07-29
Supplement: Additional file 1 [file 1860-5397-7-118-S1.pdf]

## Supporting Information

for

### Functionalization of anthracene: A selective route to brominated 1,4-anthraquinones

Kiyemet Berkil Akar<sup>1</sup>, Osman Cakmak <sup>\*1</sup>, Orhan Büyükgüngör<sup>2,§</sup>, Ertan Sahin<sup>3,§</sup>

Address: <sup>1</sup>Department of Chemistry, Faculty of Art and Science, Gaziosmanpasa University, 60250, Tokat, Turkey; <sup>2</sup>Department of Physics, Faculty of Art and Science, Ondokuzmayıs University, 55060, Samsun, Turkey and <sup>3</sup>Department of Chemistry, Faculty of Art and Science, Atatürk University, 25240, Erzurum, Turkey

Email: Kiyemet Berkil Akar - [kiyemetberkil@gmail.com](mailto:kiyemetberkil@gmail.com), \*Osman Cakmak - [cakmak.osman@gmail.com](mailto:cakmak.osman@gmail.com), Orhan Büyükgüngör - [orhanb@omu.edu.tr](mailto:orhanb@omu.edu.tr), Ertan Sahin - [ertan@atauni.edu.tr](mailto:ertan@atauni.edu.tr)

\*Corresponding author

§ Authors to whom inquiries concerning the X-ray structure should be directed.

NMR spectra of compounds **7**, **8**, **10**, **11**, **14**, **17**, **27** and **28**

## Content

|                                                 |     |
|-------------------------------------------------|-----|
| <sup>1</sup> H NMR spectrum of <b>7</b> .....   | S2  |
| <sup>13</sup> C NMR spectrum of <b>7</b> .....  | S3  |
| <sup>1</sup> H NMR spectrum of <b>8</b> .....   | S4  |
| <sup>13</sup> C NMR spectrum of <b>8</b> .....  | S5  |
| <sup>1</sup> H NMR spectrum of <b>10</b> .....  | S6  |
| <sup>13</sup> C NMR spectrum of <b>10</b> ..... | S7  |
| <sup>1</sup> H NMR spectrum of <b>11</b> .....  | S8  |
| <sup>13</sup> C NMR spectrum of <b>11</b> ..... | S9  |
| <sup>1</sup> H NMR spectrum of <b>14</b> .....  | S10 |
| <sup>13</sup> C NMR spectrum of <b>14</b> ..... | S11 |
| <sup>1</sup> H NMR spectrum of <b>17</b> .....  | S12 |
| <sup>13</sup> C NMR spectrum of <b>17</b> ..... | S13 |
| <sup>1</sup> H NMR spectrum of <b>27</b> .....  | S14 |
| <sup>13</sup> C NMR spectrum of <b>27</b> ..... | S15 |
| <sup>1</sup> H NMR spectrum of <b>28</b> .....  | S16 |
| <sup>13</sup> C NMR spectrum of <b>28</b> ..... | S17 |

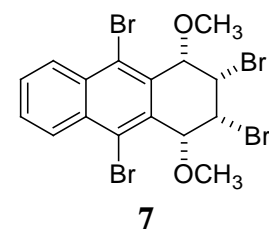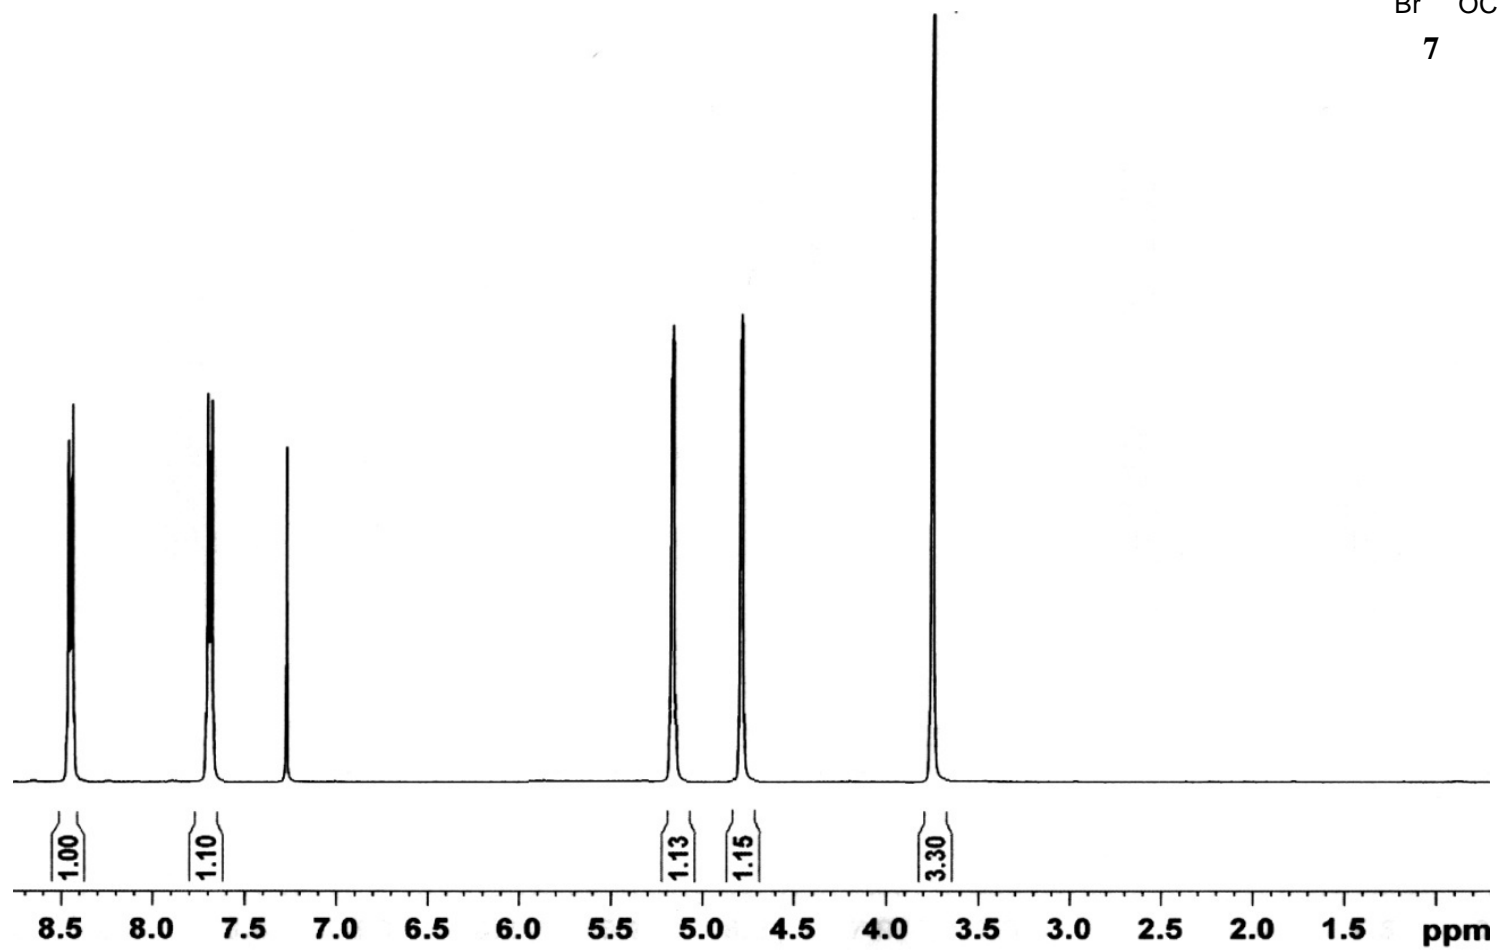

S2

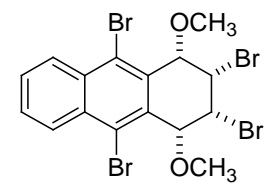

7

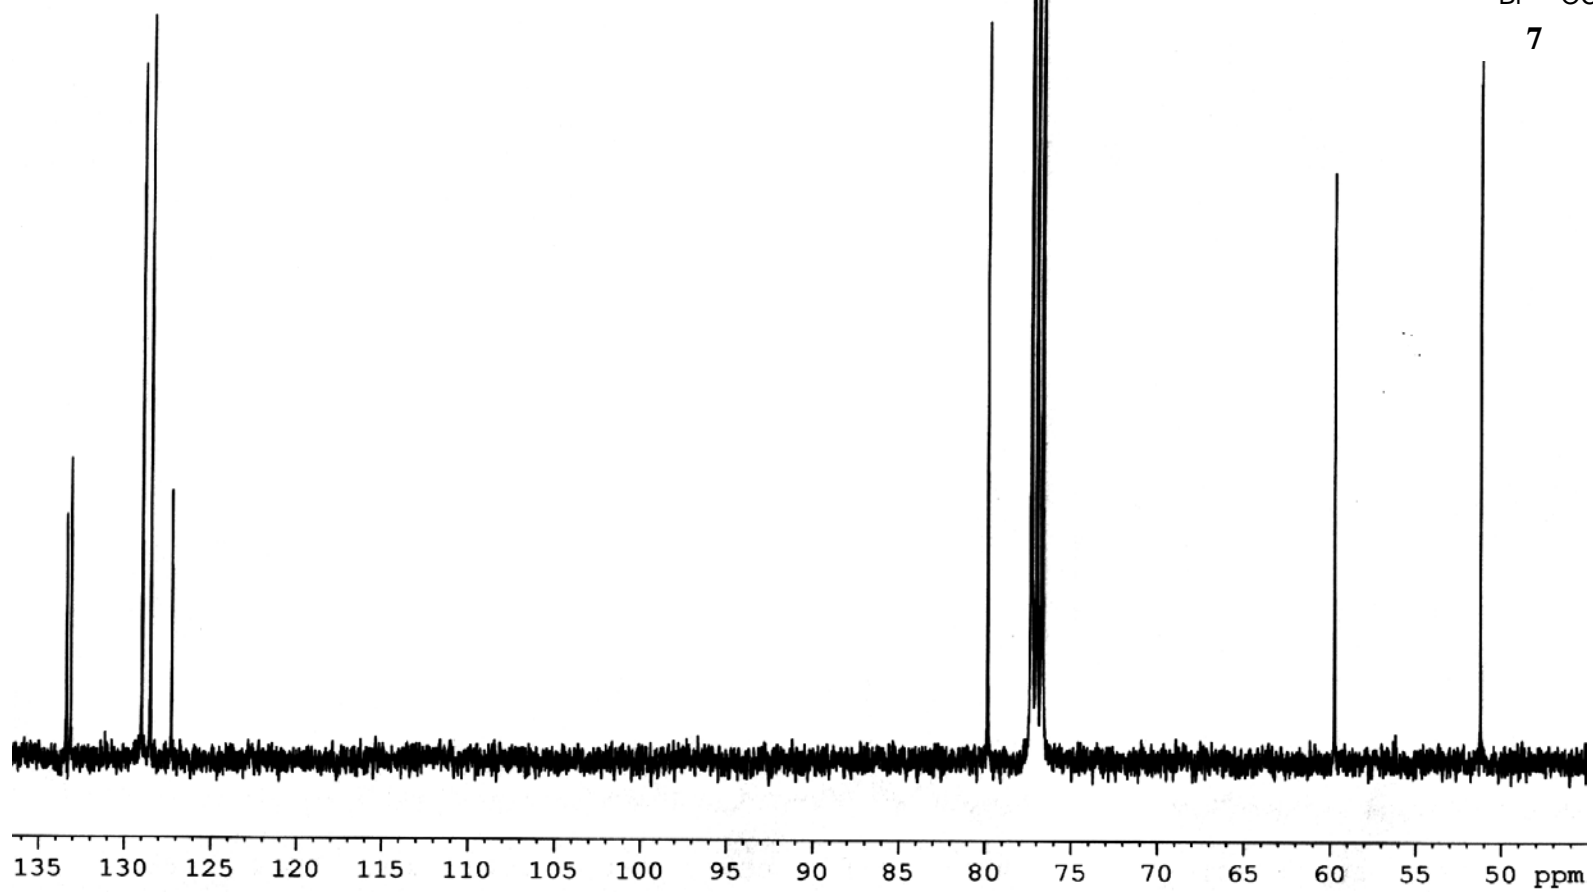

S3

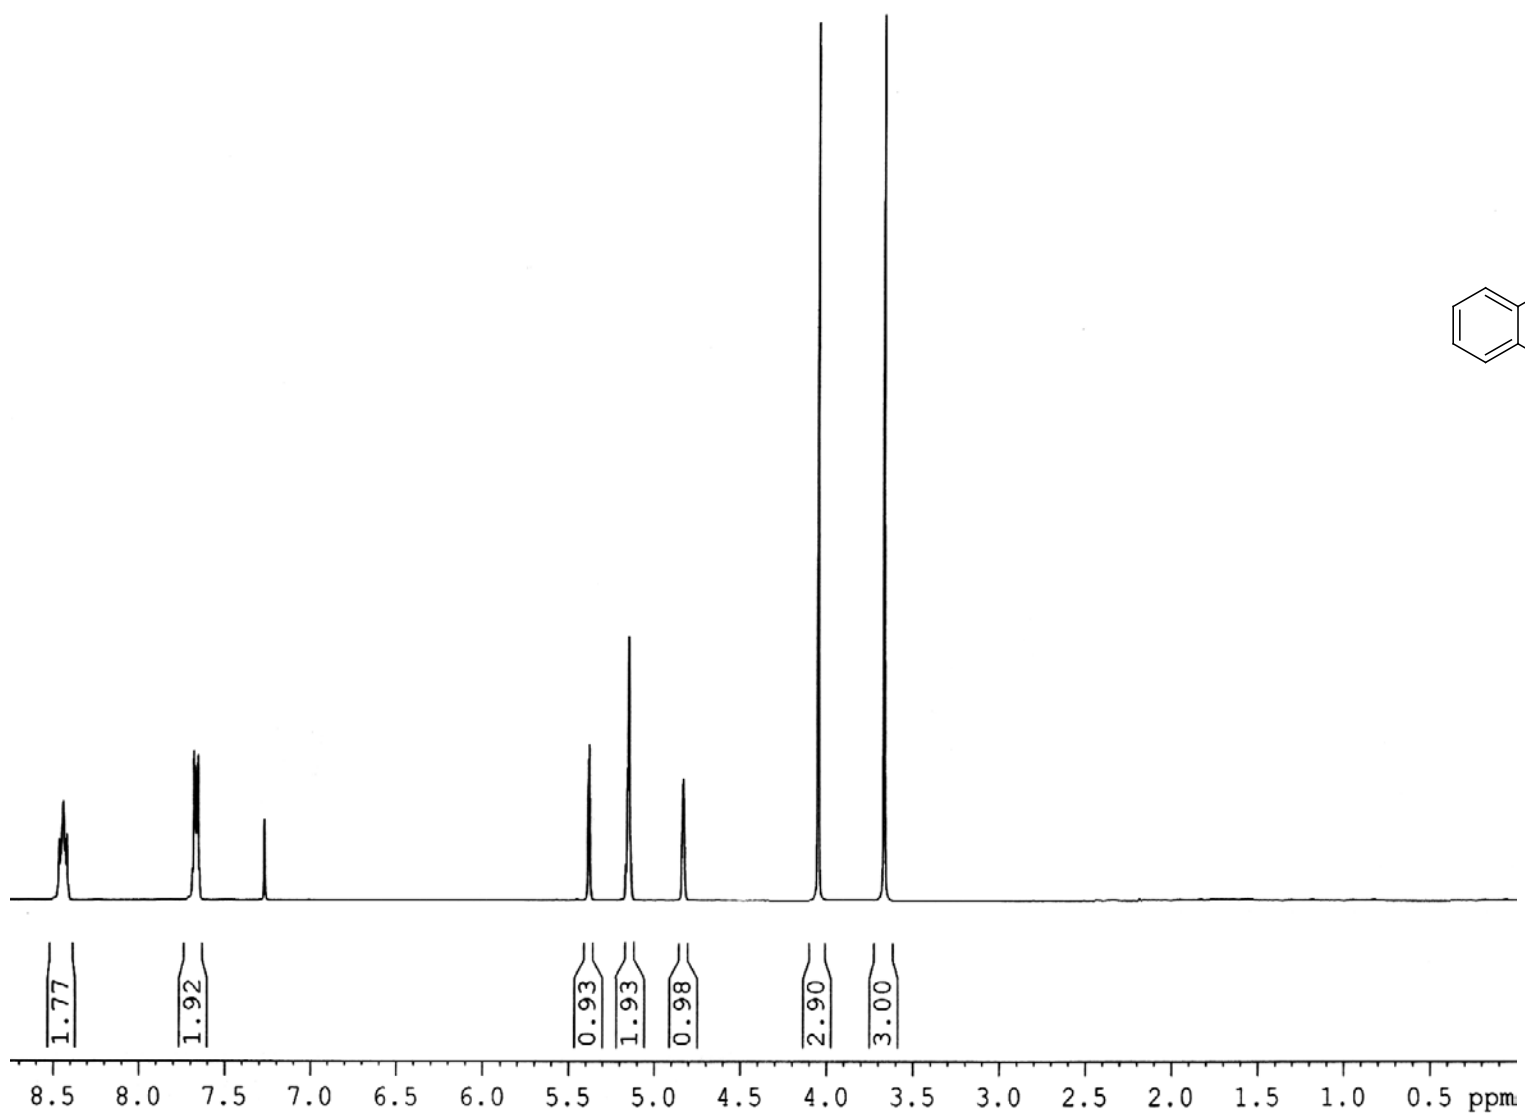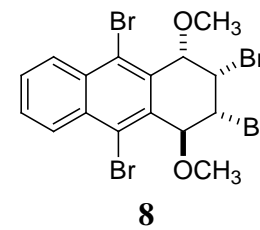

S4

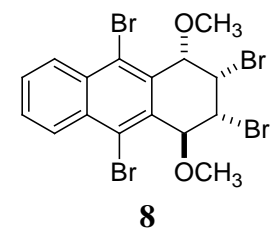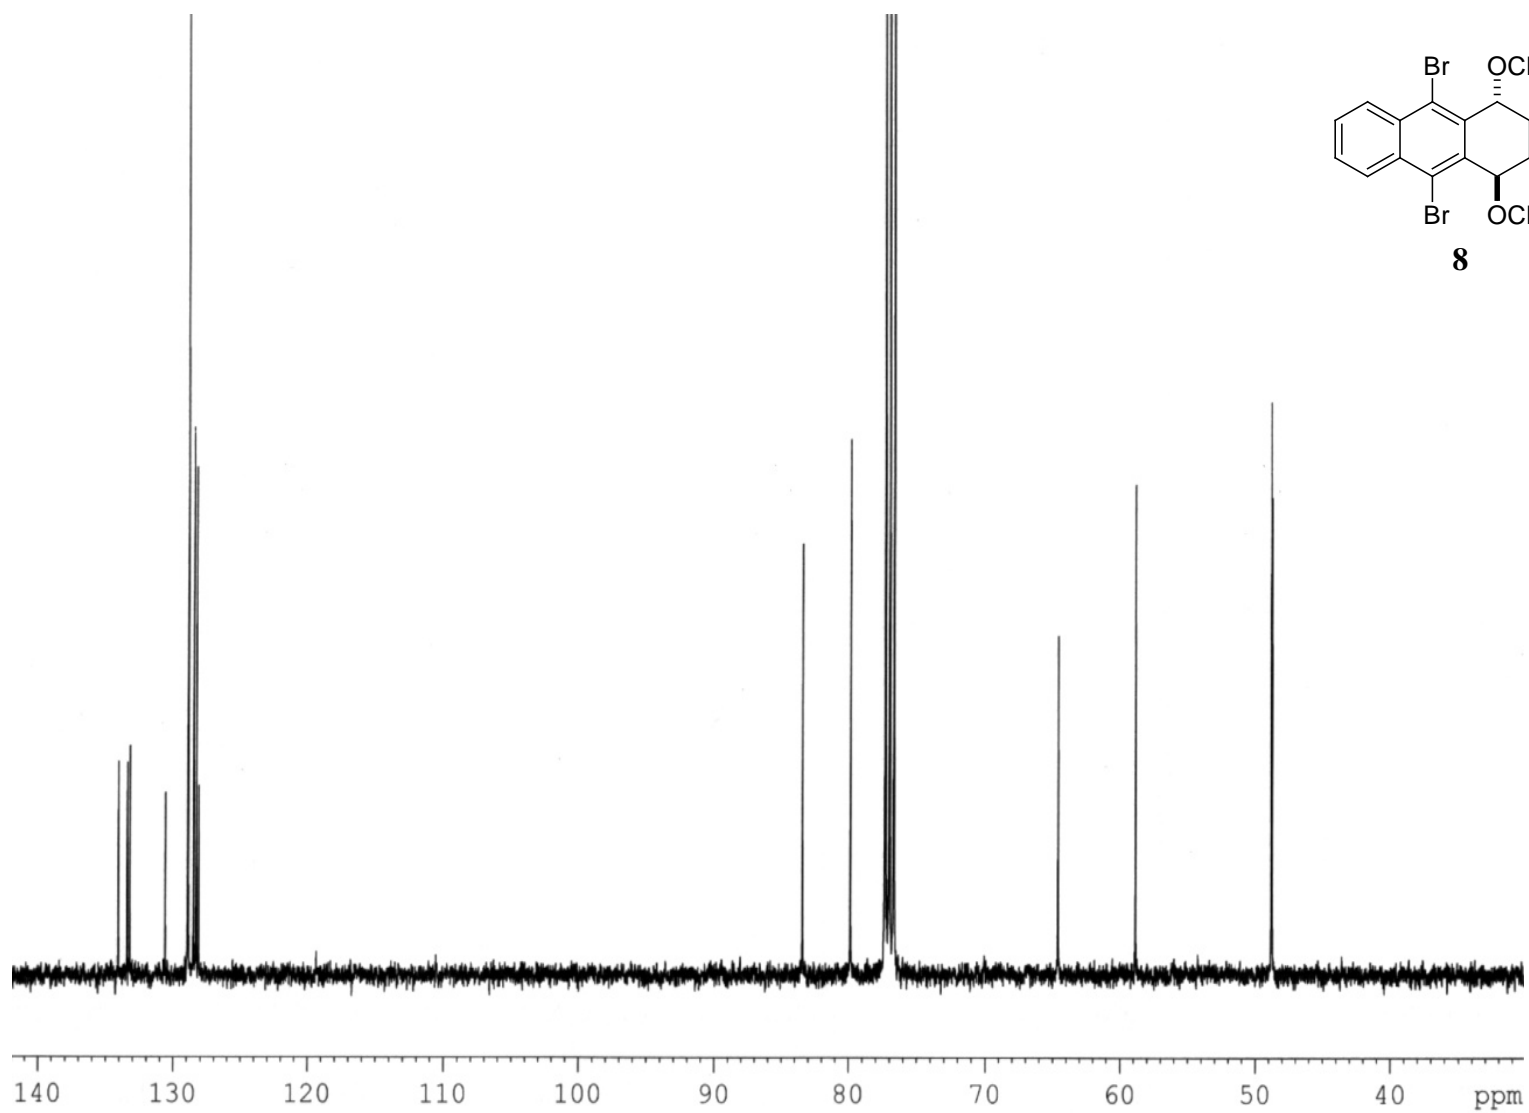

**S5**

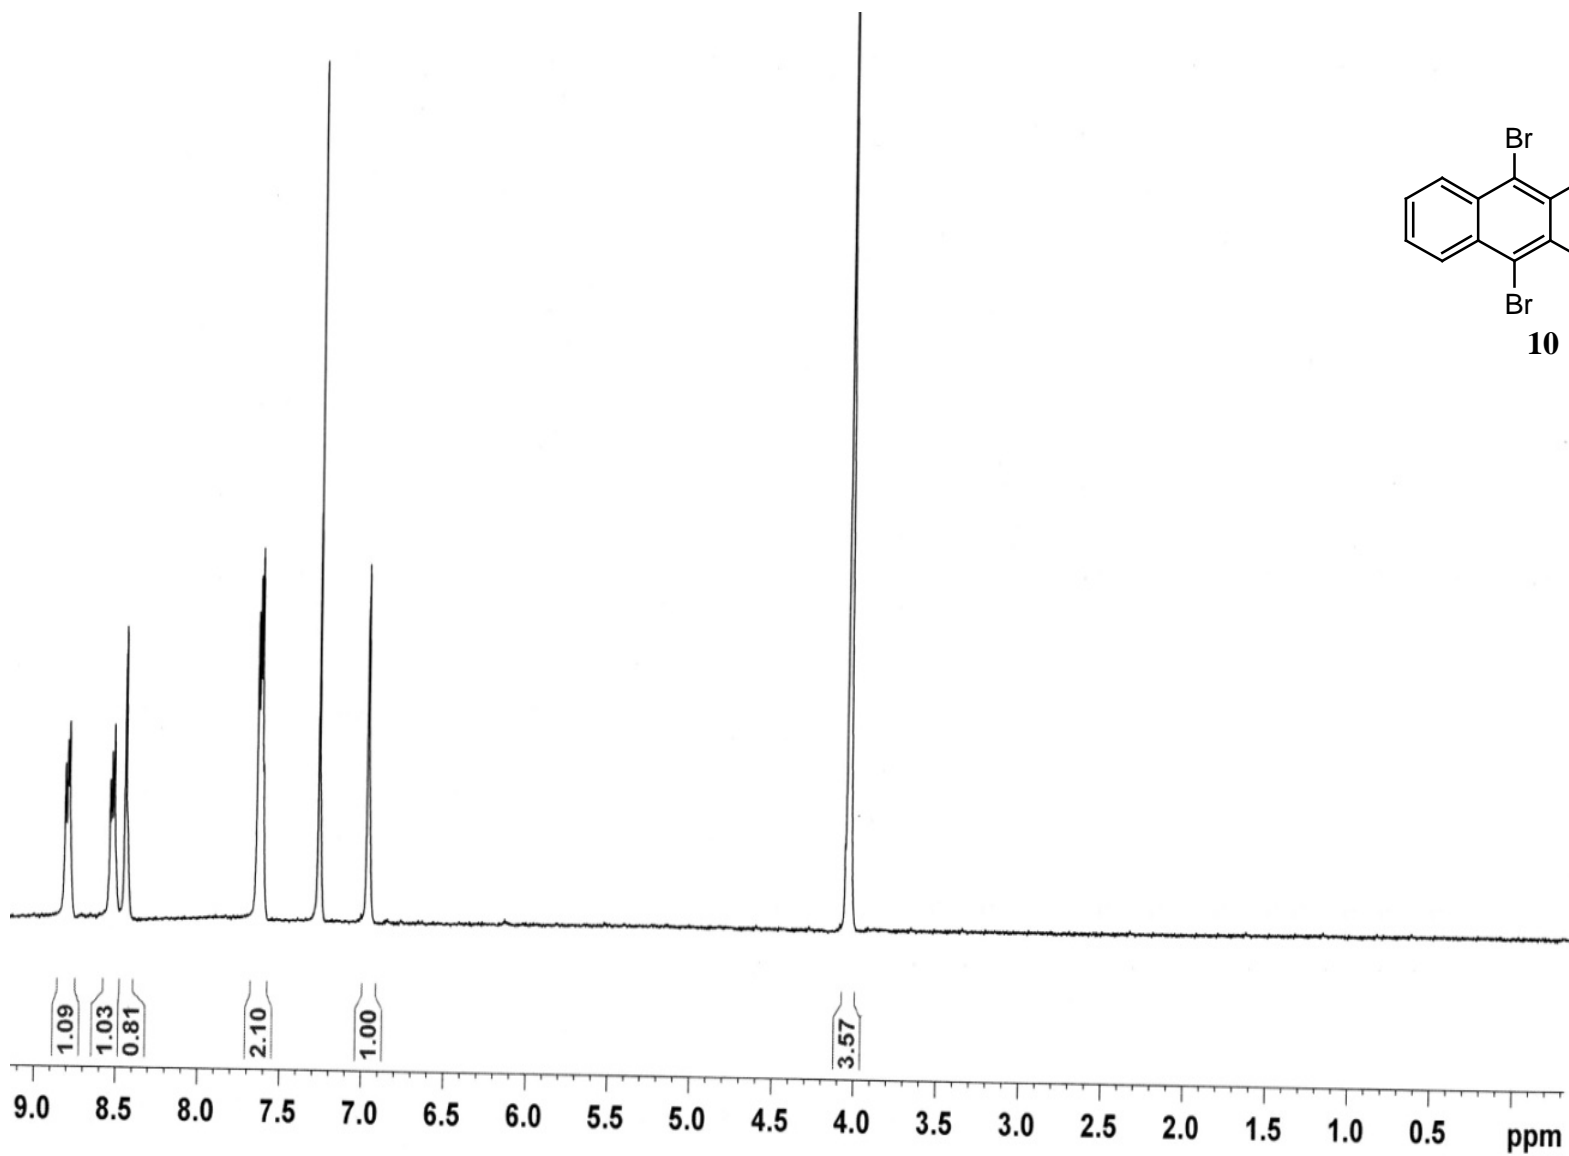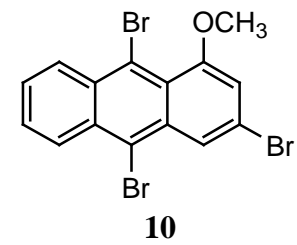

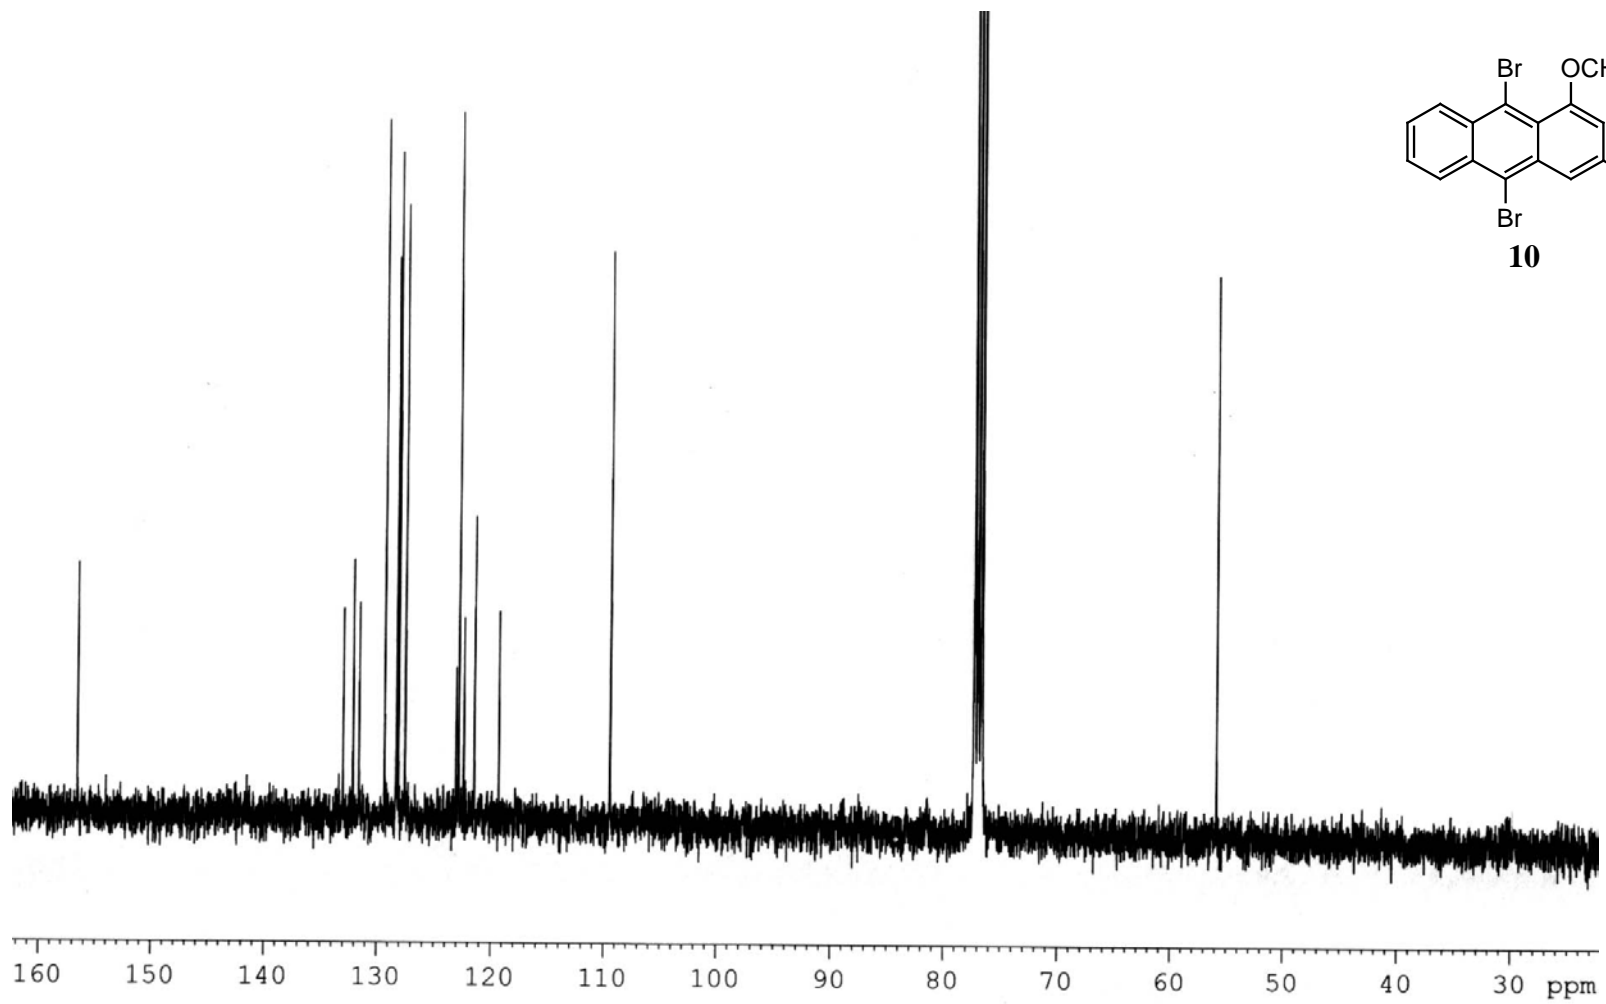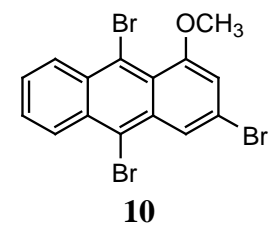



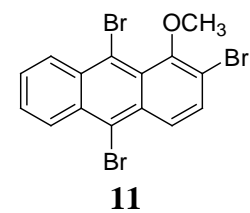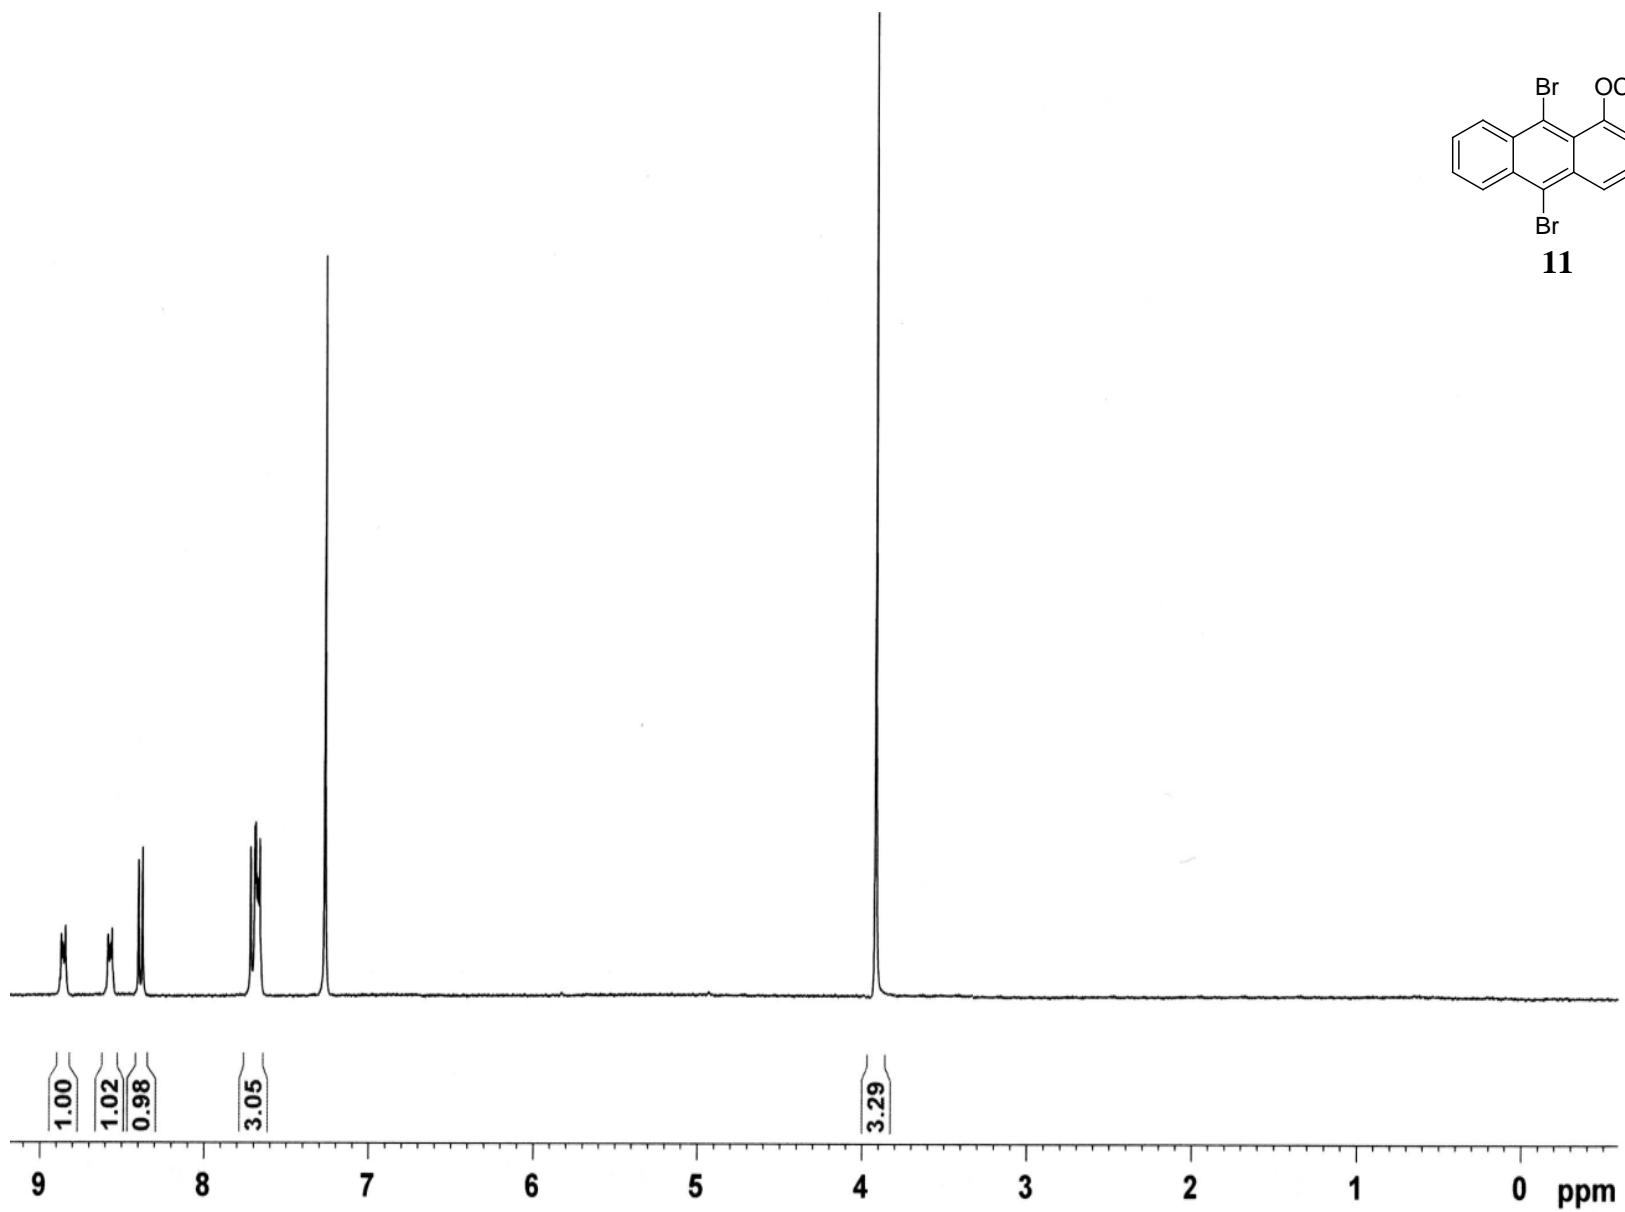

S8

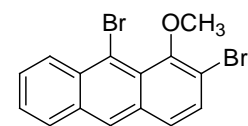

**11**

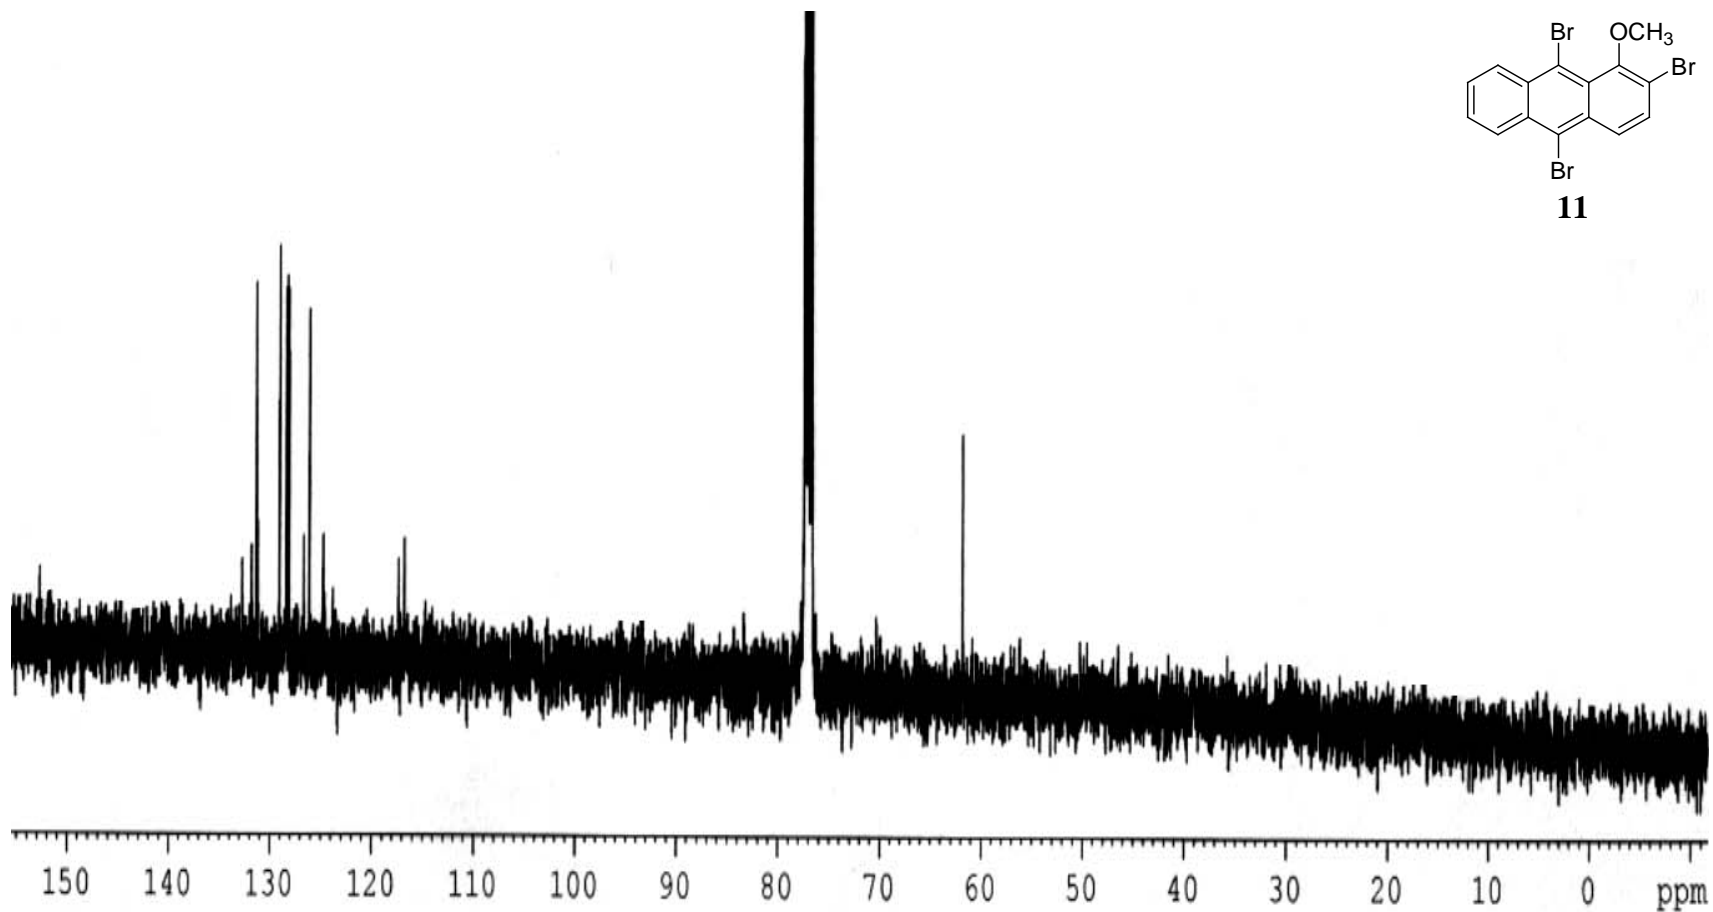

**S9**

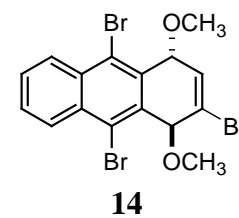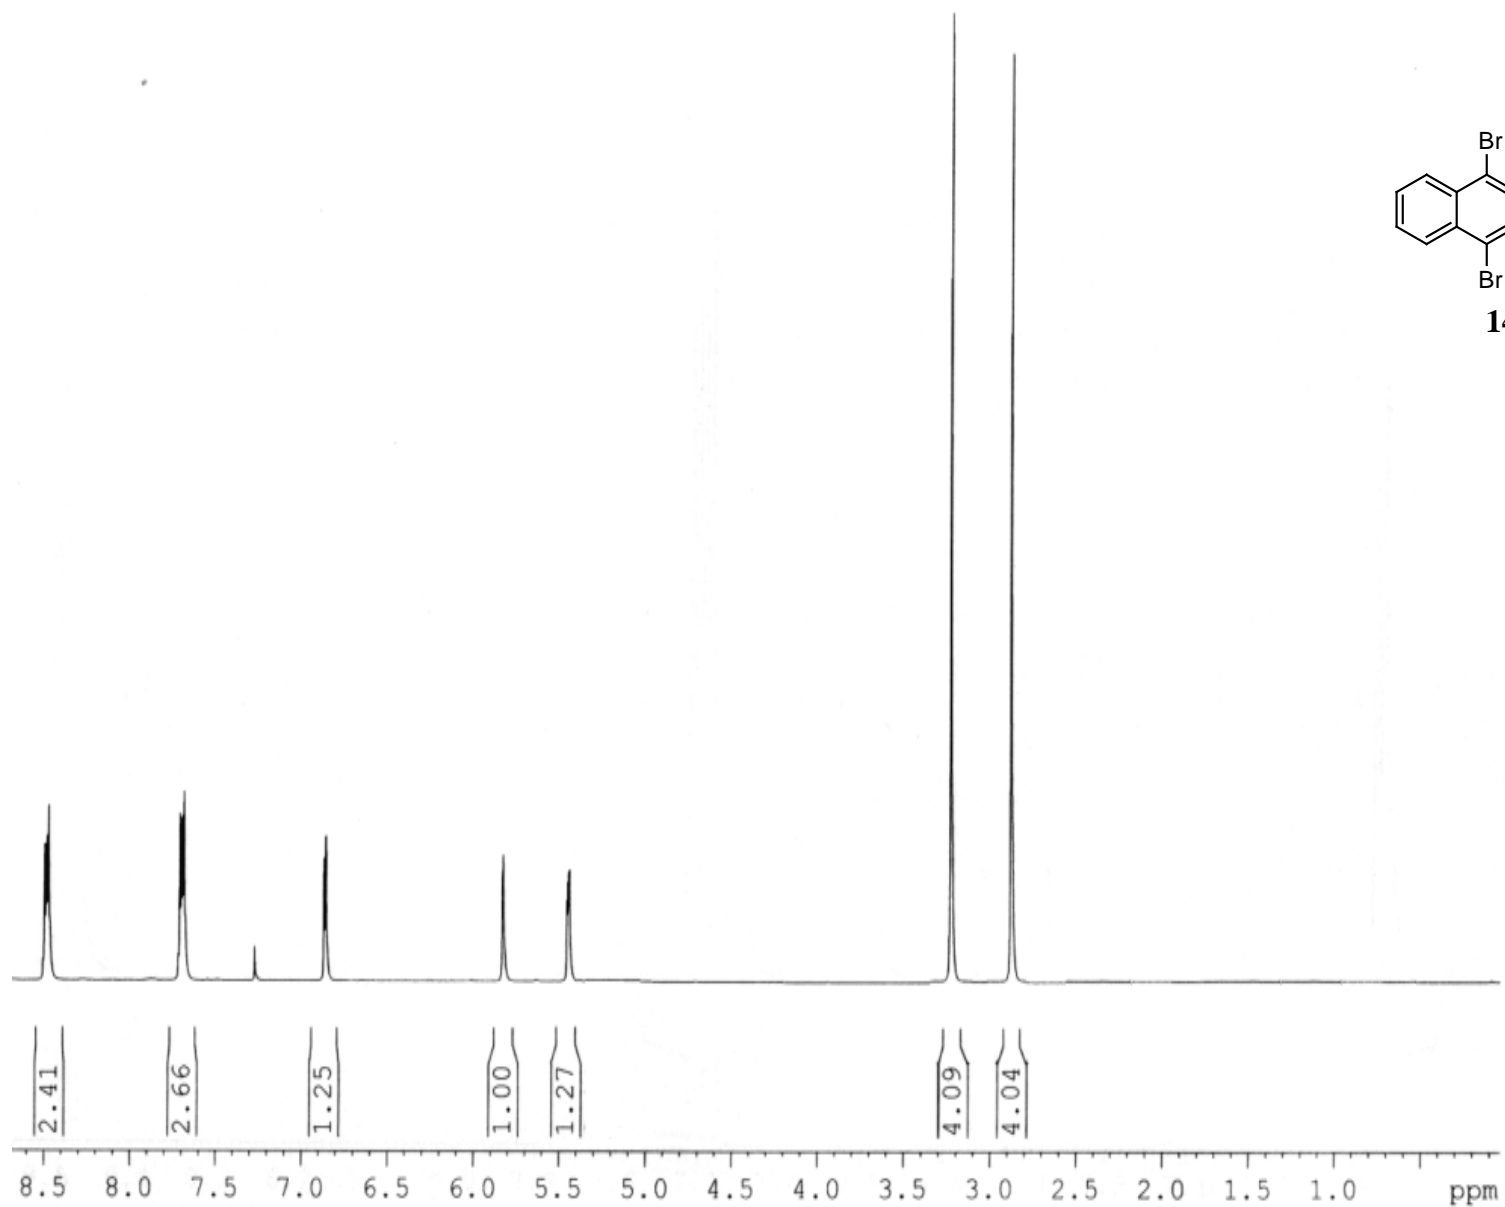

**S10**

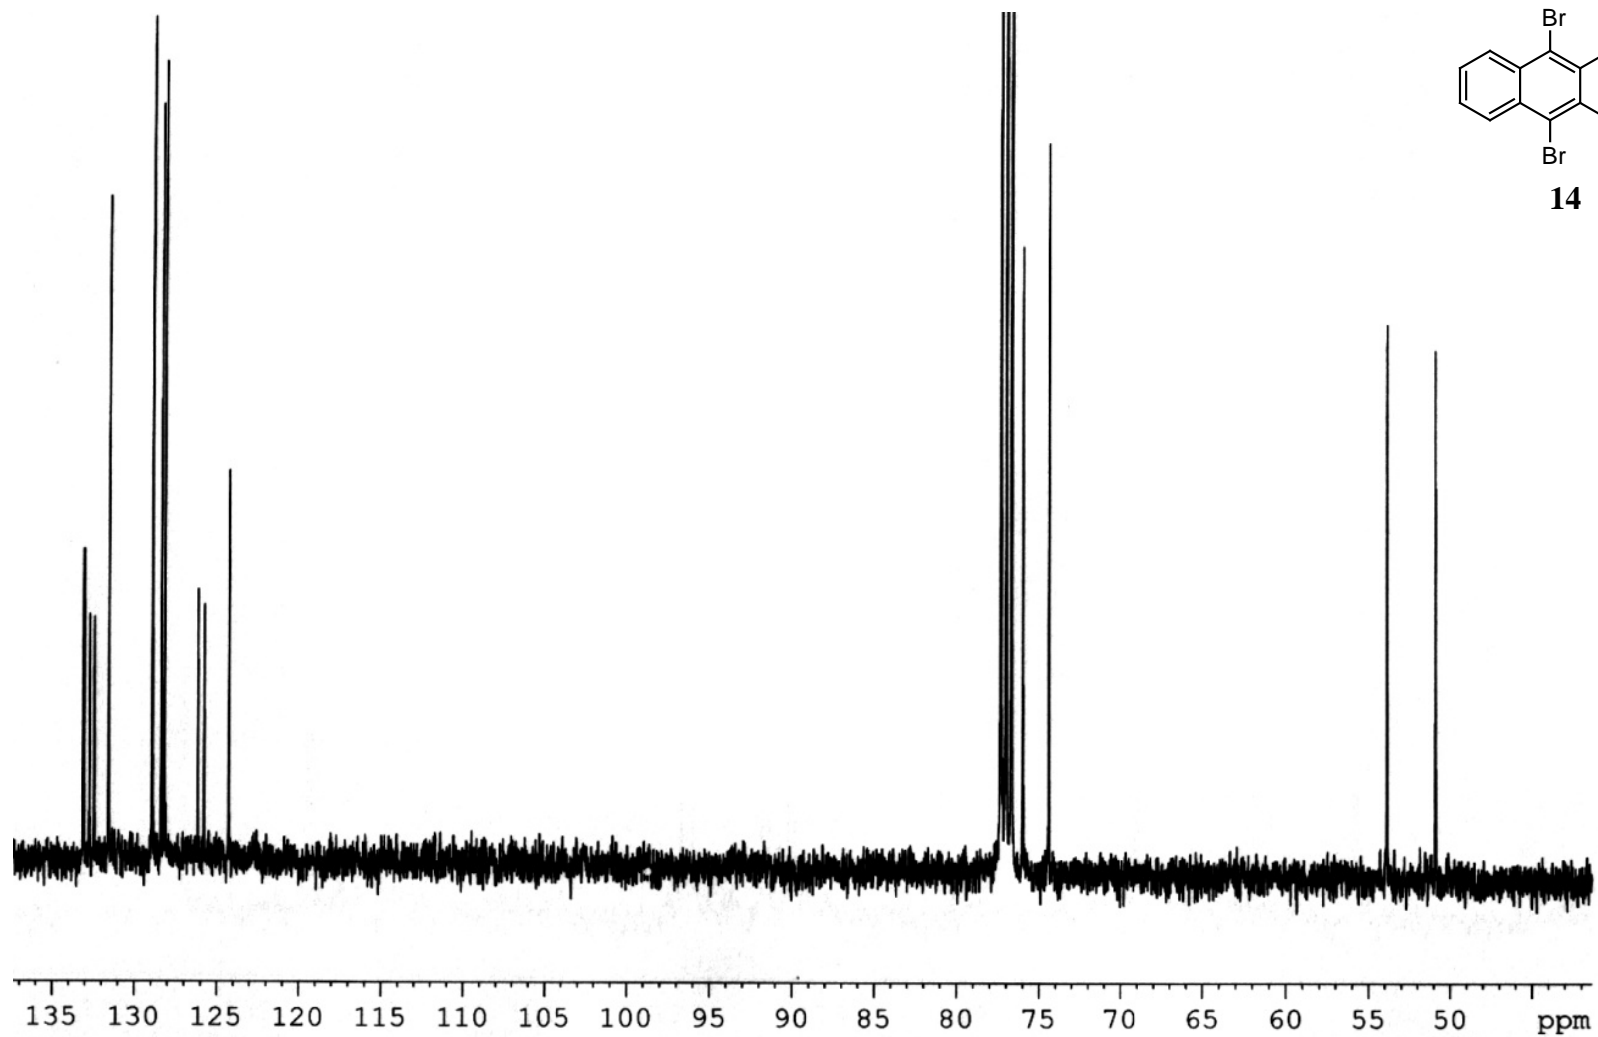

**S11**

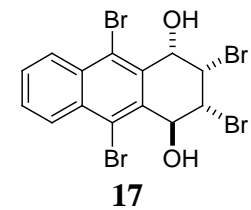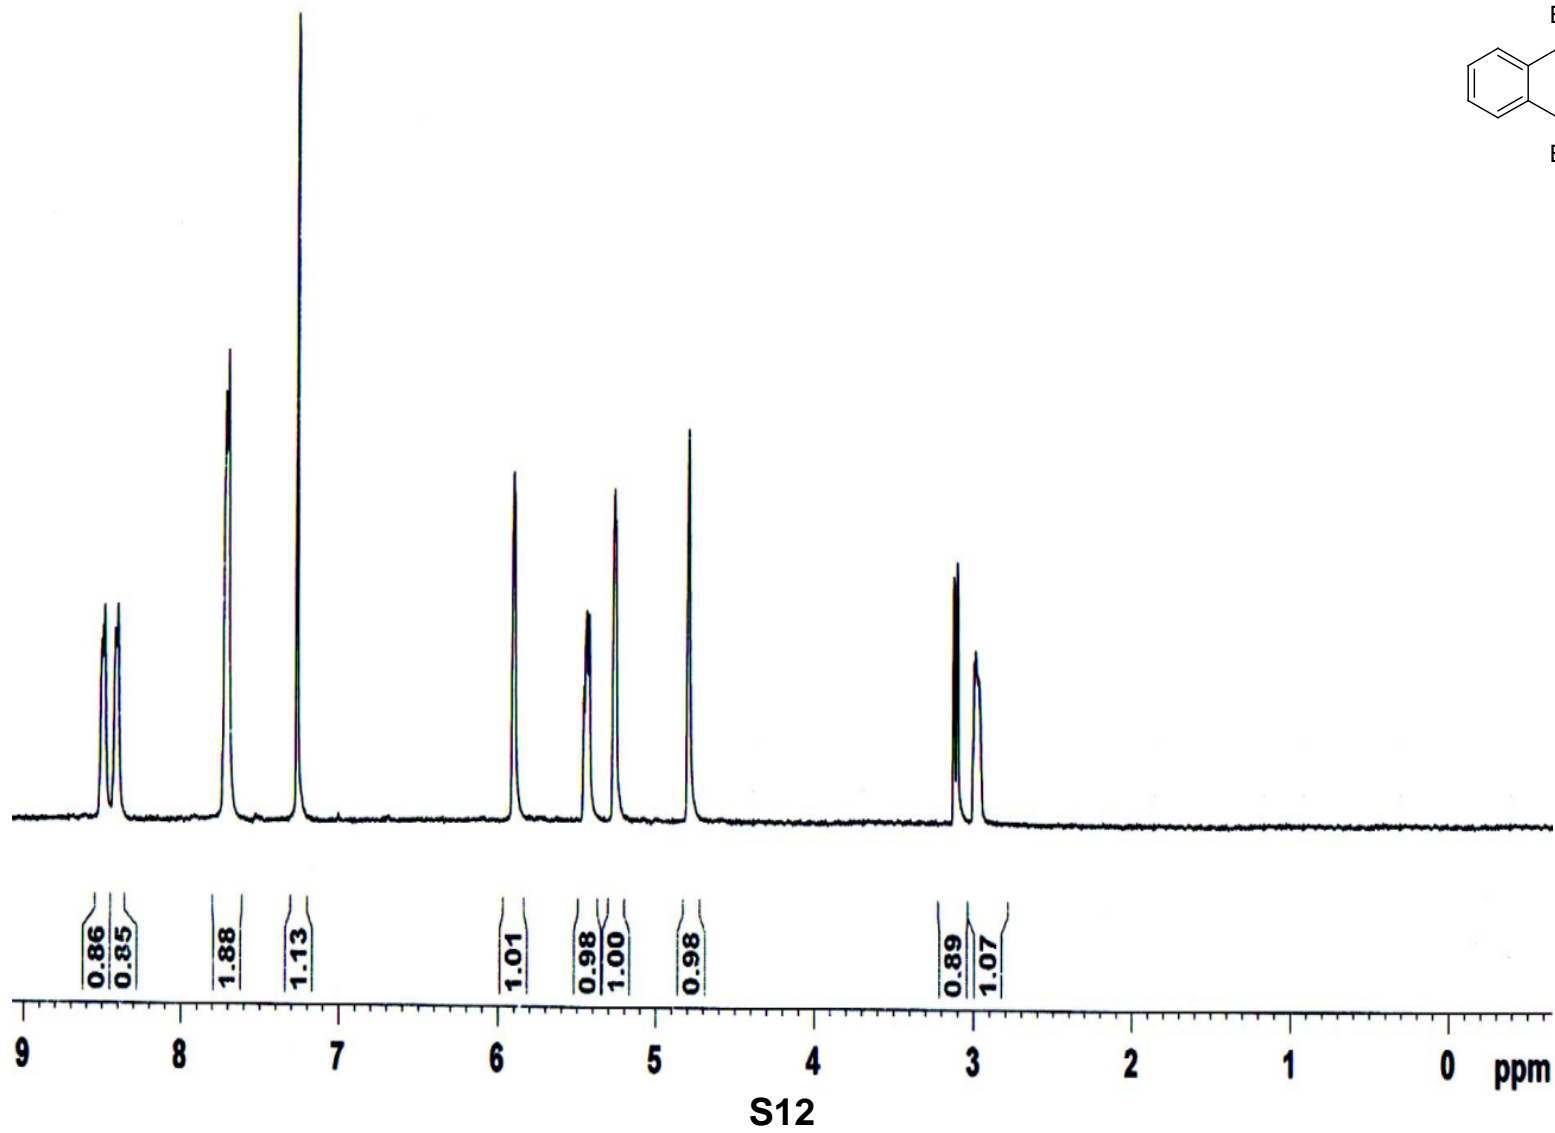

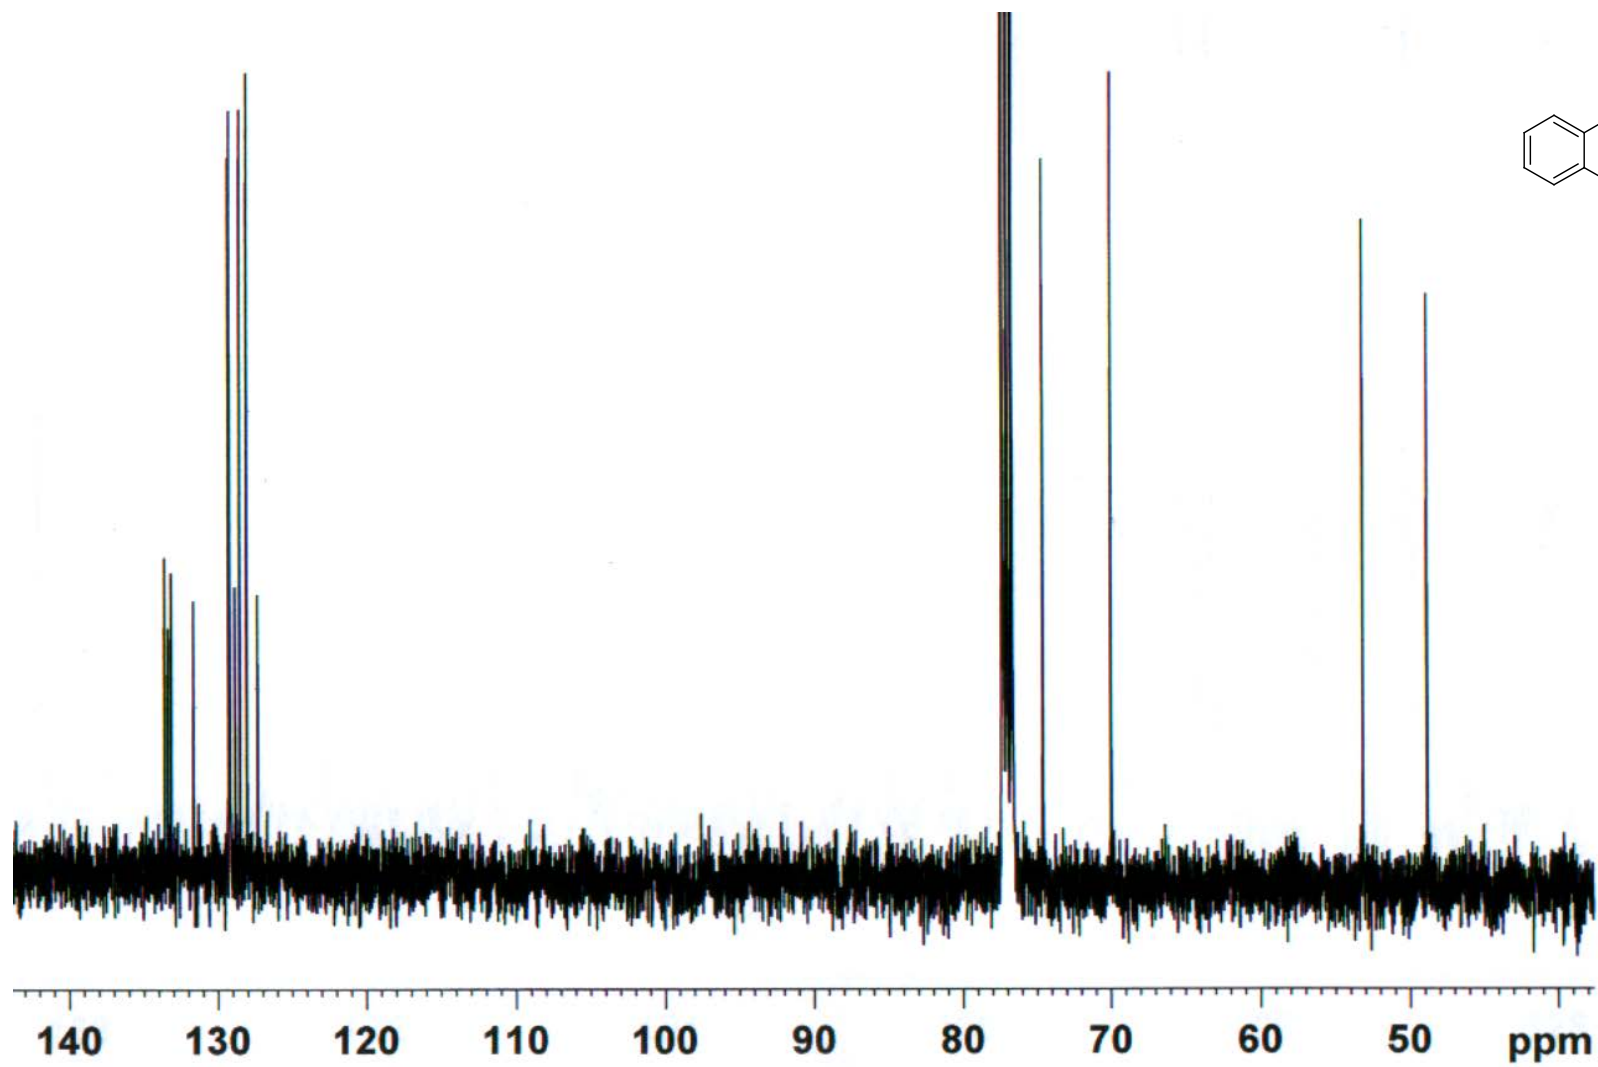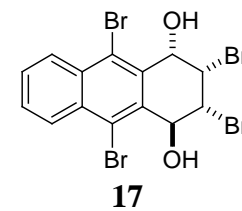

S13

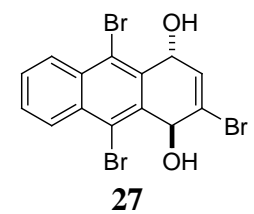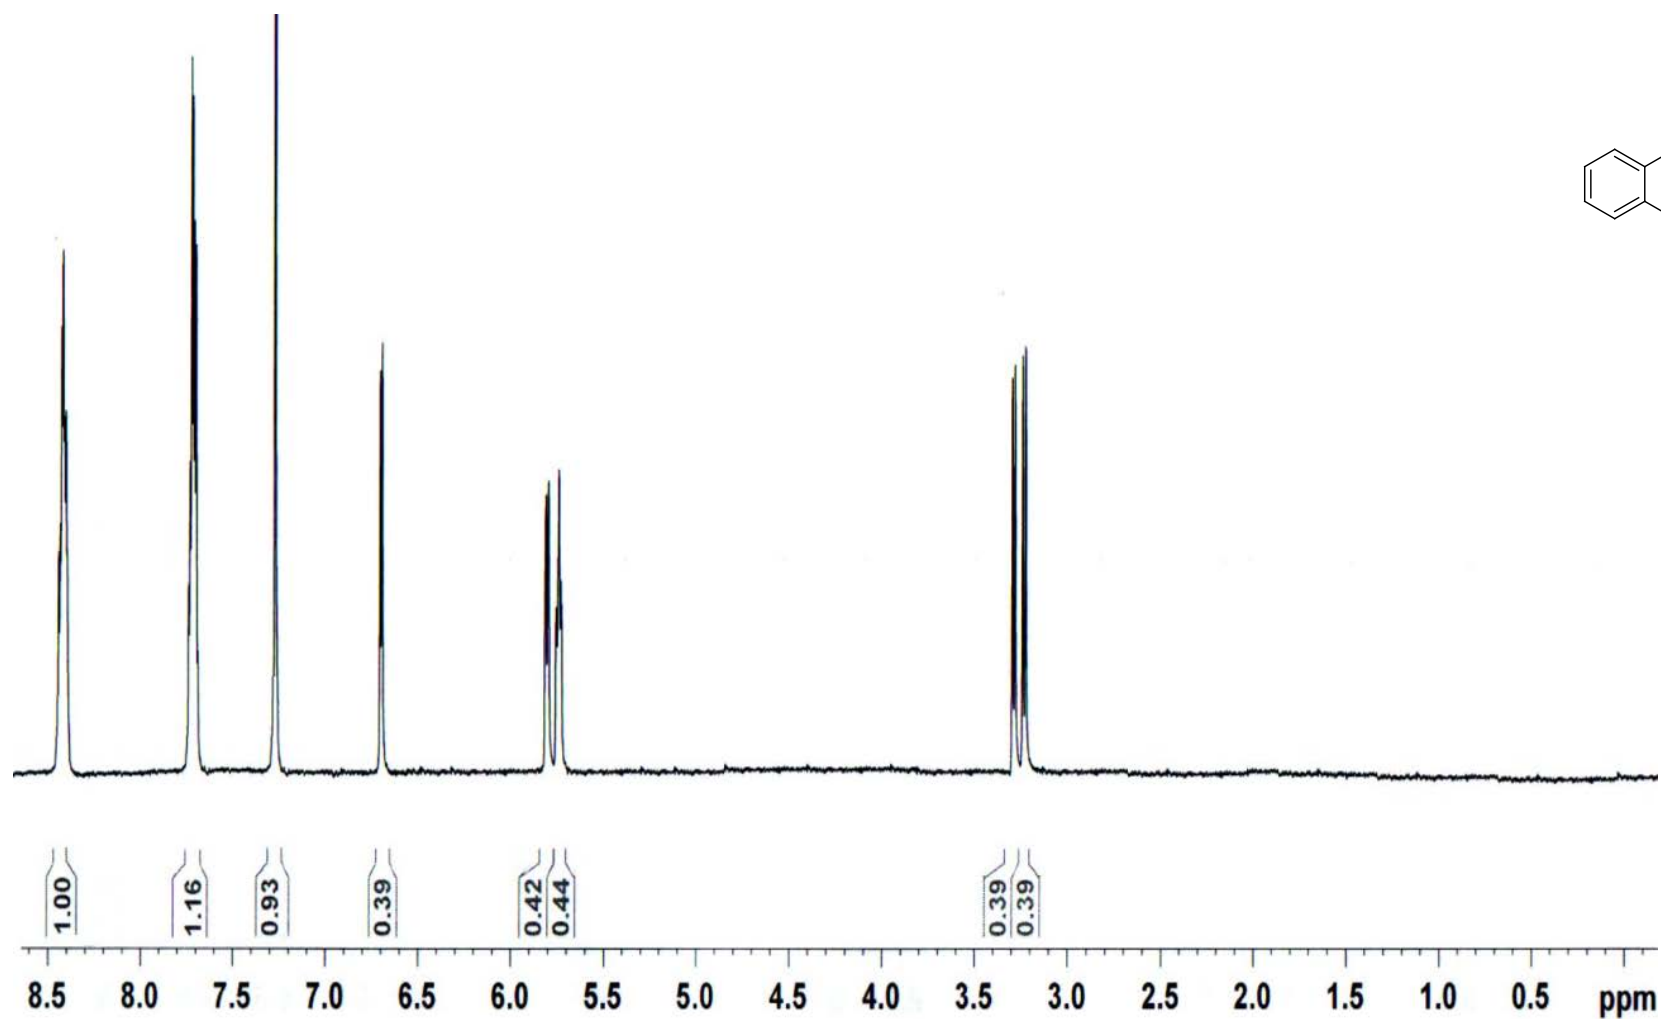

S14

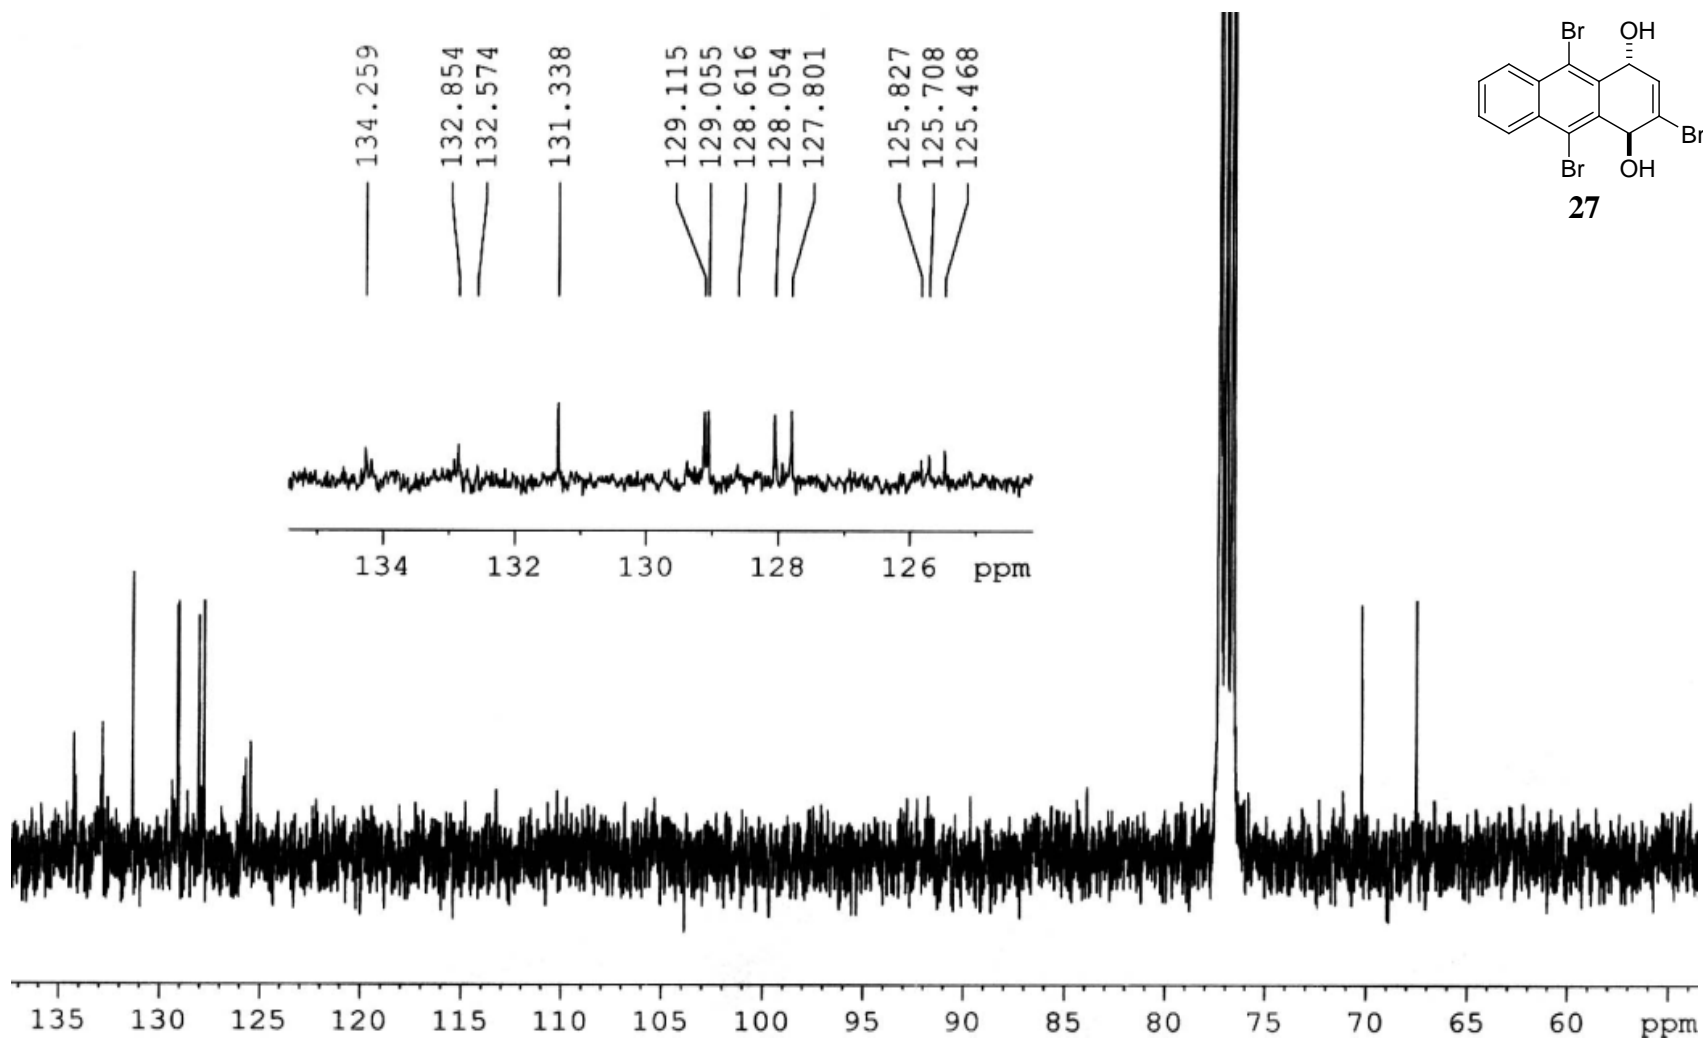

S15



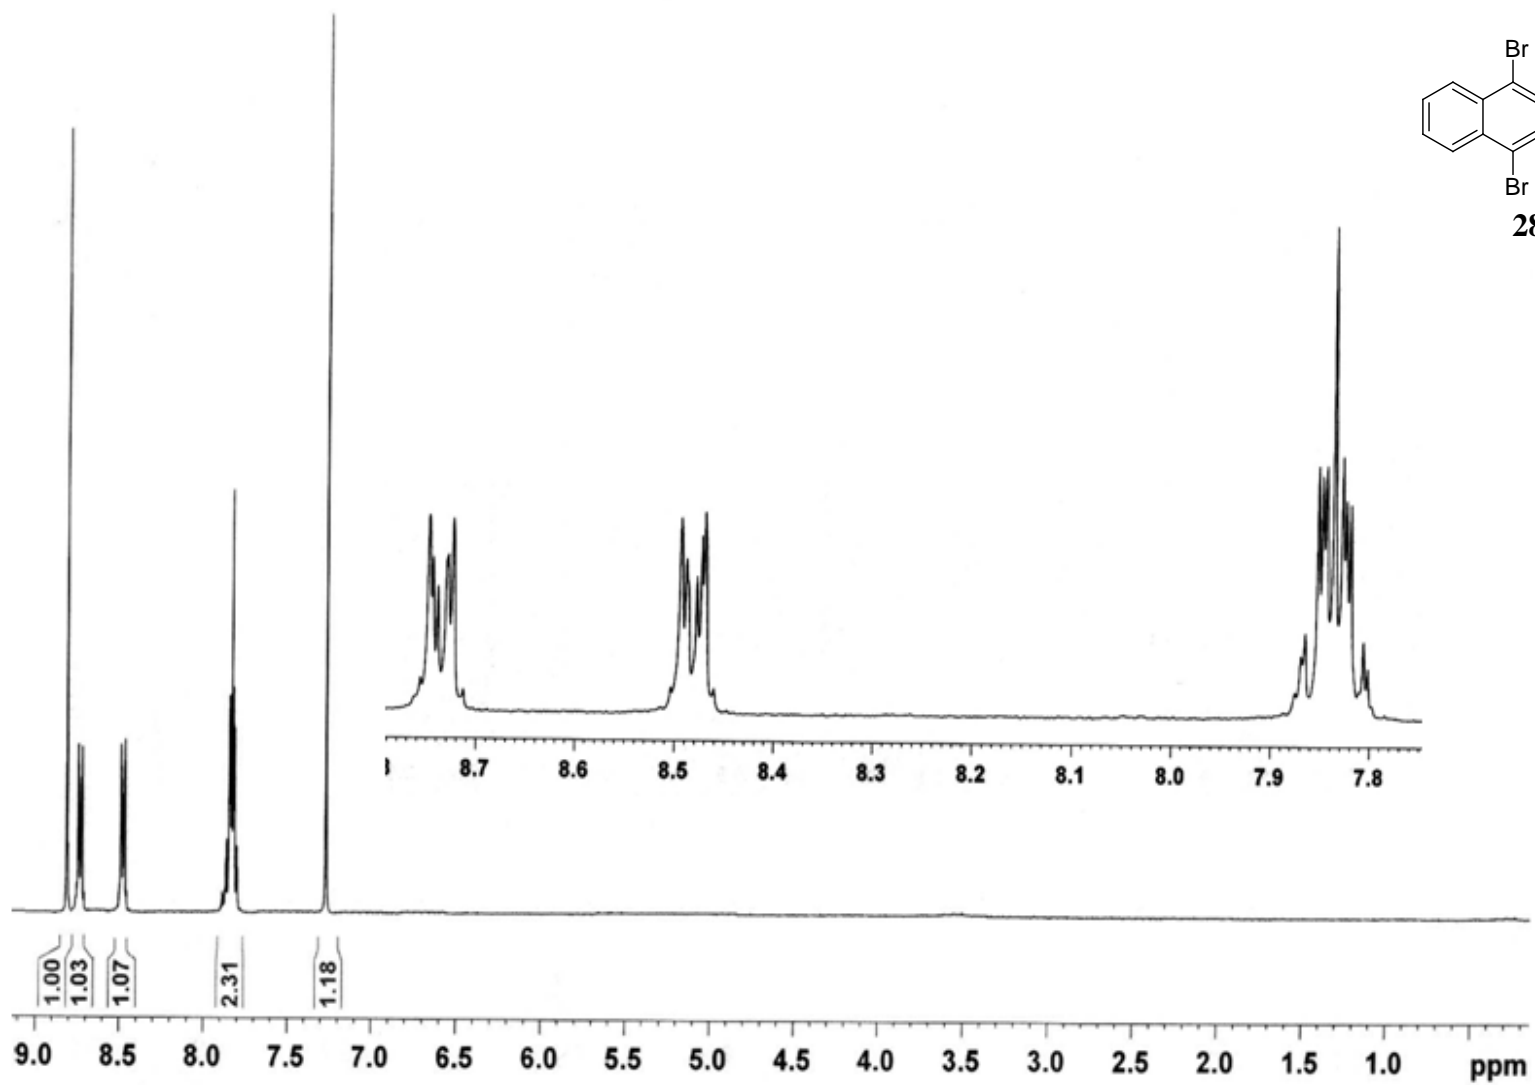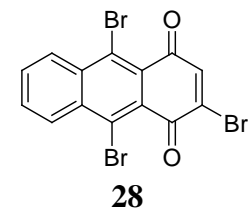

S16

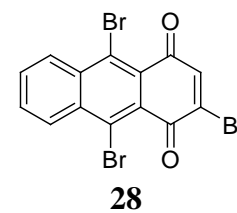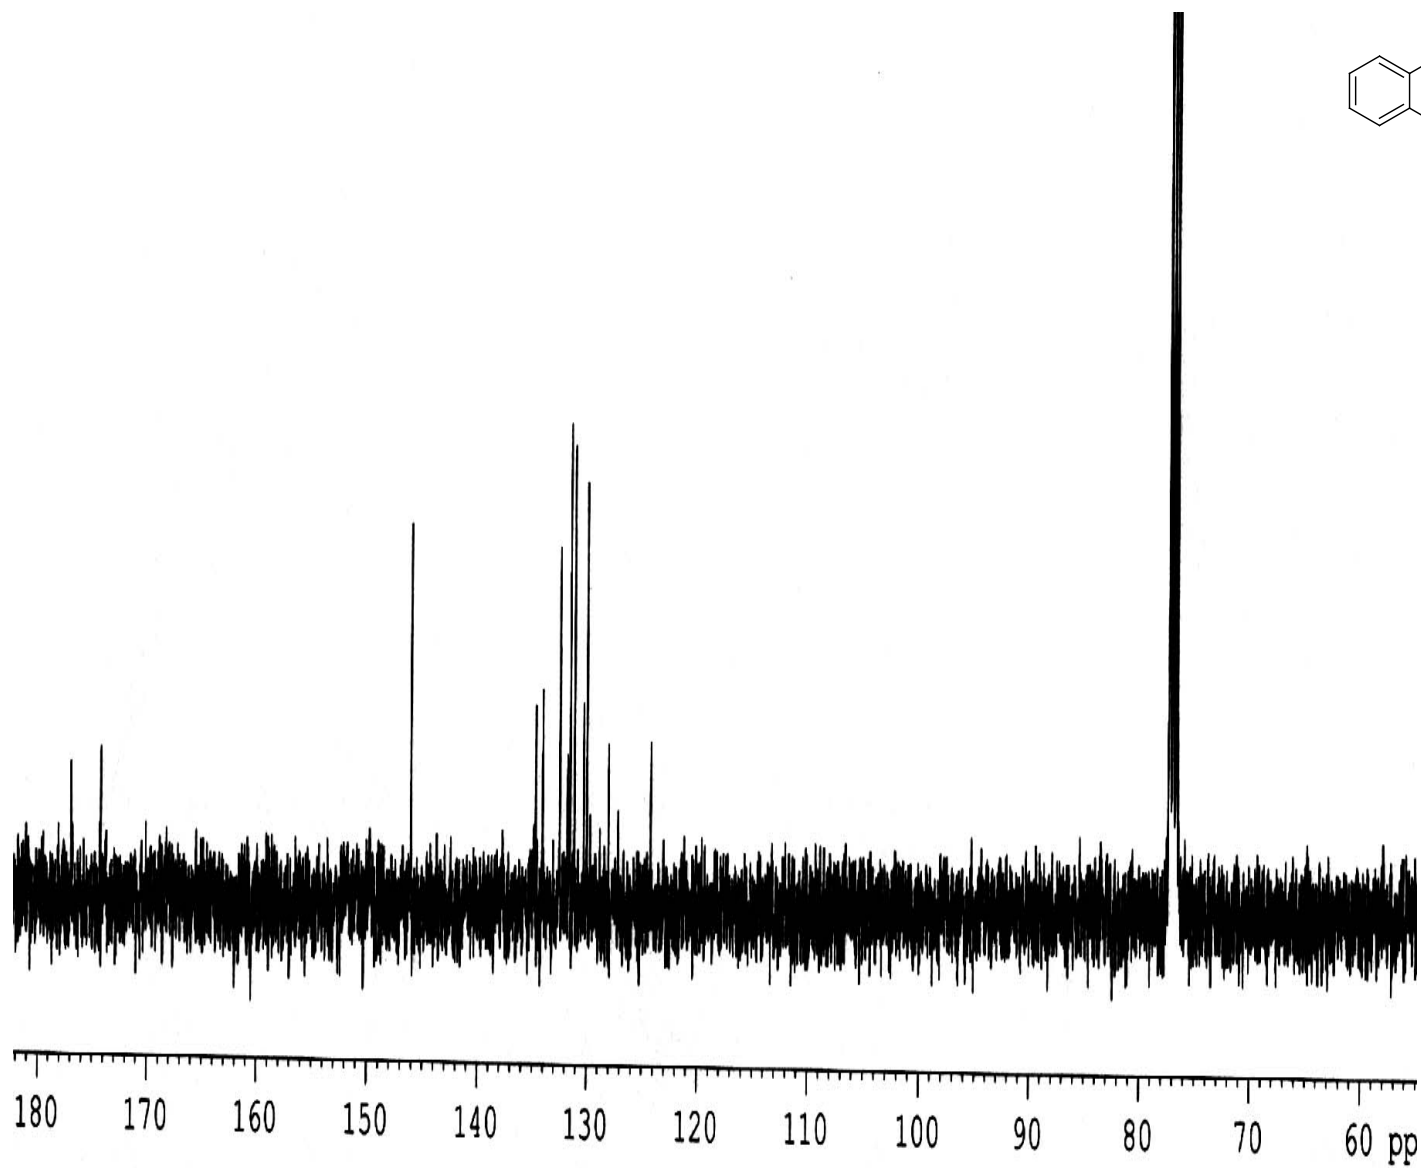

**S17**
